# Supplementary material for: The Discovery of New Inhibitors of Insulin-Regulated Aminopeptidase by a High-Throughput Screening of 400,000 Drug-like Compounds
Source: MDPI journal article supplement (doi:10.3390/ijms25074084), 2024-04-06
Supplement: s1 [file s1]

# The Discovery of New Inhibitors of Insulin Regulated Amino Peptidase by A High-Throughput Screening of 400 000 Drug-like Compounds

Johan Gising<sup>1,\*</sup>, Saman Honarnejad<sup>2</sup>, Maaïke Bras<sup>2</sup>, Gemma L. Baillie<sup>3</sup>, Stuart P. McElroy<sup>3</sup>, Philip S. Jones<sup>3</sup>, Angus Morrison<sup>3</sup>, Julia Beveridge<sup>1</sup>, Mathias Hallberg<sup>4</sup>, Mats Larhed<sup>1</sup>

<sup>1</sup>The Beijer Laboratory, Science for Life Laboratory, Department of Medicinal Chemistry, Uppsala University, BMC, P.O. Box 574, SE-751 23 Uppsala, Sweden

<sup>2</sup>Pivot Park Screening Centre, Kloosterstraat 9, 5349 AB, Oss, The Netherlands

<sup>3</sup>BioAscent Discovery Ltd, Bo 'Ness Road, Newhouse, Lanarkshire ML1 5UH, United Kingdom

<sup>4</sup>The Beijer Laboratory, Department of Pharmaceutical Biosciences, Neuropharmacology and Addiction Research, BMC, Uppsala University, P.O. Box 591, SE-751 24 Uppsala, Sweden

\*Corresponding author, johan.gising@angstrom.uu.se

## Supplementary materials

Table of contents:

|                                                                                                                                 |    |
|---------------------------------------------------------------------------------------------------------------------------------|----|
| Equations S1 .....                                                                                                              | 2  |
| Fig. S1. Reference compound structures: <b>IVDE-77</b> , <b>HA08</b> and <b>I</b> .....                                         | 2  |
| Fig. S2. Assay principle of the IRAP assays.....                                                                                | 2  |
| Fig. S3. Km determination for the IRAP Fluorescence assay in 1536-well format.....                                              | 3  |
| Fig. S4. Km determination for the IRAP Absorbance assay in 1536-well format.....                                                | 3  |
| Fig. S5. Fluorescence IRAP assay with black non-binding plates and 0.05% BSA added to the assay buffer in 1536-well format..... | 4  |
| Fig. S6. Absorbance IRAP assay with black non-binding plates and 0.05% BSA added to the assay buffer in 1536-well format.....   | 4  |
| Fig. S7. Absorbance IRAP assay with black non-binding plates and 0.05% BSA added to the assay buffer in 1536-well format.....   | 5  |
| Fig. S8. Fluorescence IRAP assay reagent stability.....                                                                         | 5  |
| Fig. S9. Reference compounds in Fluorescence IRAP assay with different end volumes in 1536-well format.....                     | 6  |
| Fig. S10. Fluorescence IRAP assay with automated dispensing; S/B ratio, Z'-values and %CV.....                                  | 7  |
| Fig. S11. Robustness set tested on duplicate plates for the Fluorescence IRAP assay.....                                        | 7  |
| Fig. S12. Thermal Shift assay dose response results of <b>HA08</b> and <b>I</b> .....                                           | 8  |
| Fig. S13. S/B (blue bars) and Z' values (red dots) for the primary and orthogonal IRAP assay.....                               | 9  |
| Fig. S14. Structures of remaining QHL compounds.....                                                                            | 10 |
| Table S1. Summarized screening results and compound properties.....                                                             | 11 |
| Table S2. Compound ELF screening history.....                                                                                   | 12 |
| References.....                                                                                                                 | 12 |

## Equations S1

$$\% \text{ Effect} = \frac{(\mu p - \mu n) - (\mu p - X)}{(\mu p - \mu n)} * 100 ; \text{ measured value (X), mean } (\mu), \text{ positive (p) and negative (n) control}$$

S/B signal/background ratio

$$Z' = 1 - \frac{3(\sigma p + \sigma n)}{|\mu p - \mu n|} ; \text{ standard deviation } (\sigma), \text{ mean } (\mu), \text{ positive (p) and negative (n) control}$$

$$\text{Z-score} = \frac{X - \mu n}{\sigma n} ; \text{ measured value (X), standard deviation } (\sigma), \text{ mean } (\mu), \text{ negative (n) control}$$

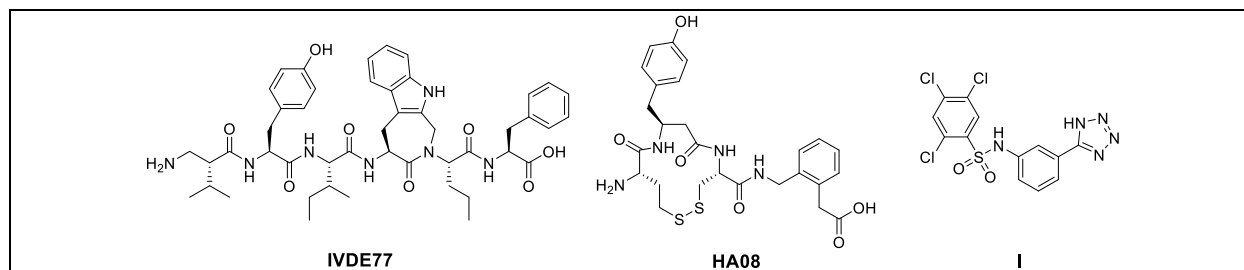

**Figure S1. Reference compound structures. IVDE77<sup>1</sup>, HA08<sup>2</sup>, I<sup>3</sup>.**

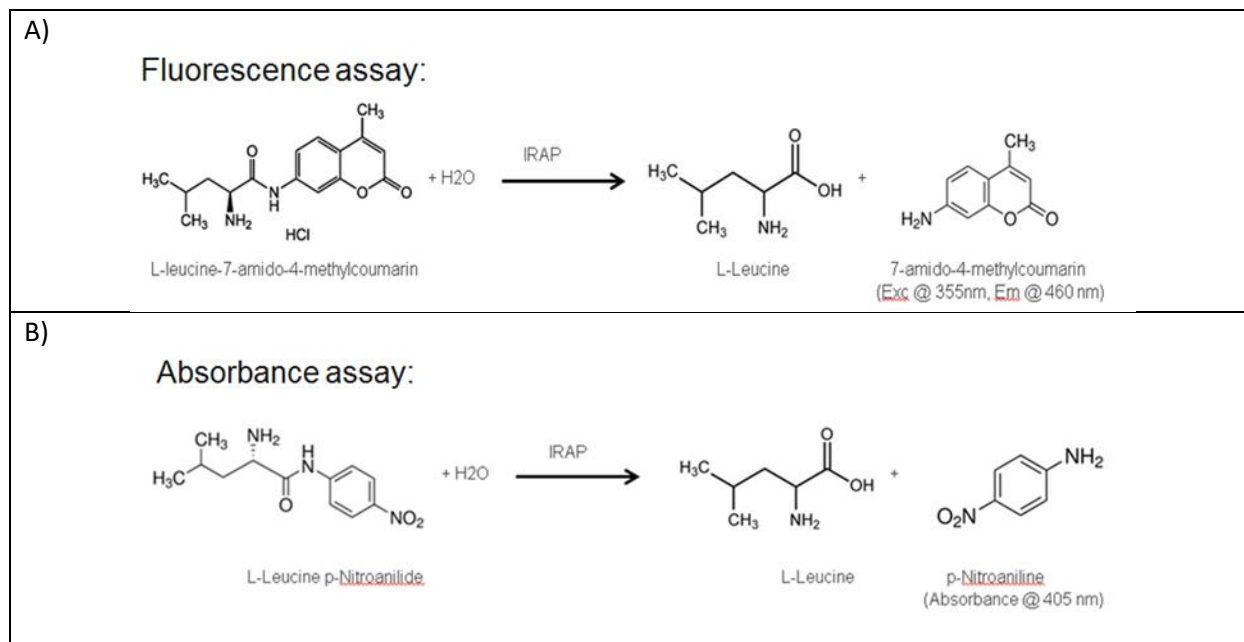

**Figure S2. Assay principle of the IRAP assays.** The substrates (A) L-Leucine-7-amido-4-methylcoumarin (Fluorescence) or (B) L-Leucine p-Nitroanilide (Absorbance) can be cleaved by the IRAP protein resulting in the amino acid L-Leucine and a measurable group. For the fluorescence assay 7-amido-4-methylcoumarin can be excited at 355 nM after which emission can be measured at 460 nm. For the absorbance assay the absorbance of p-Nitroaniline can be measured at 405 nM. When a compound inhibits the IRAP protein, the cleavage of the substrates will not take place and no signal will be measured.

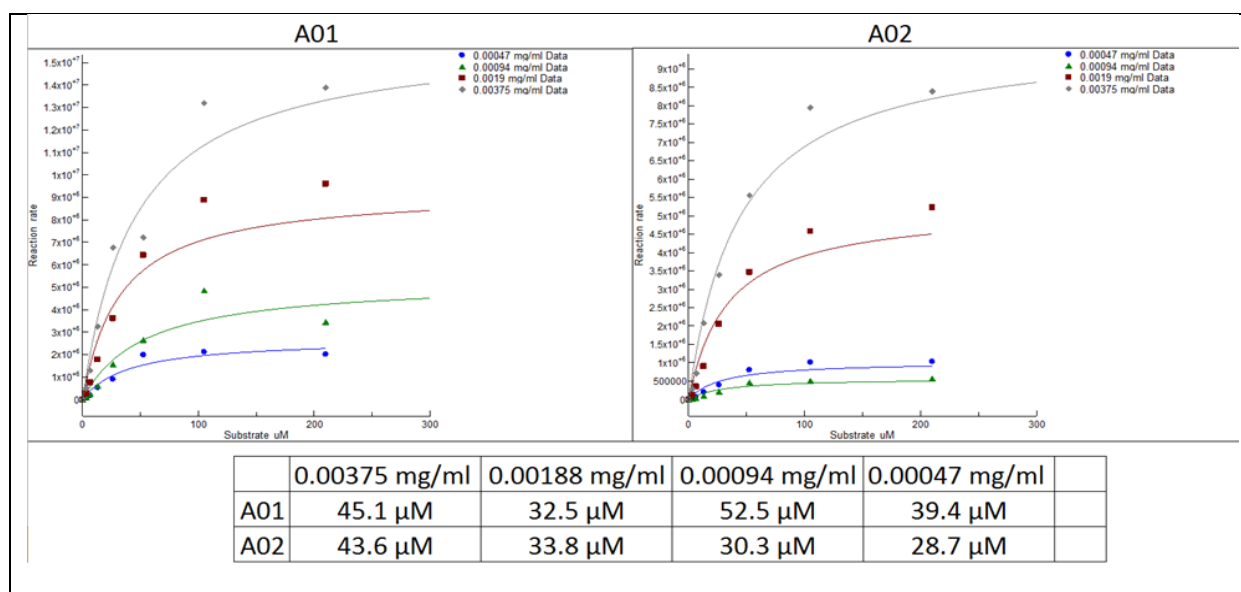

**Figure S3. Km determination for the IRAP Fluorescence assay in 1536-well format.** Km calculation at 4 protein concentrations (0.00375, 0.00188, 0.00094 and 0.00047 mg/mL) using Xlfit version 5.4.0.8.

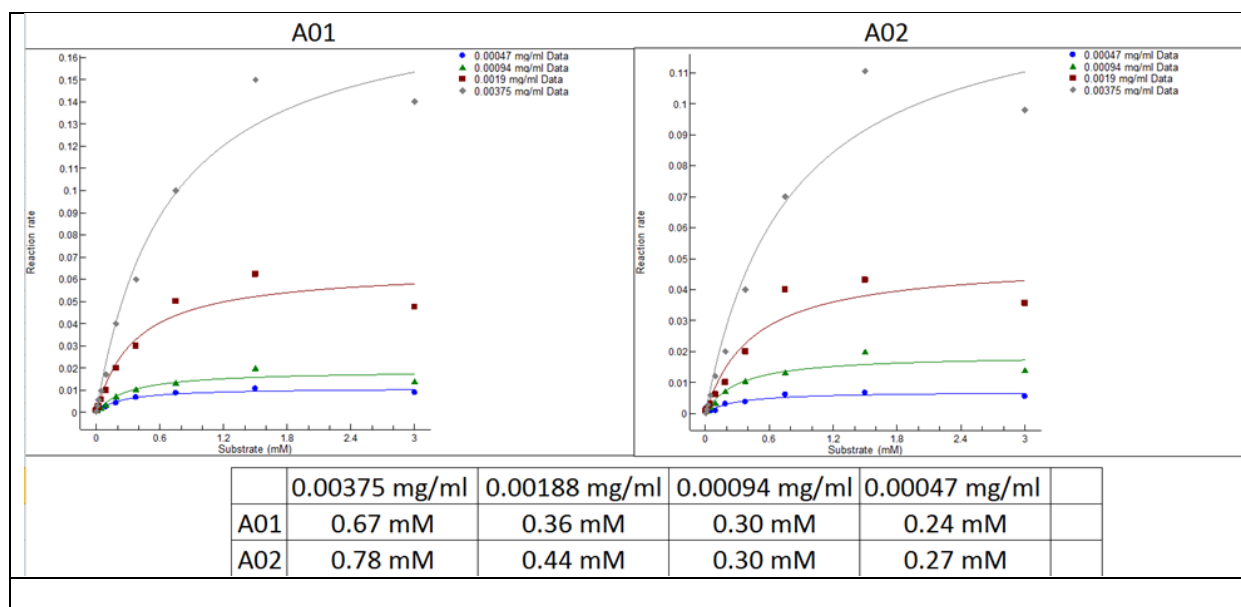

**Figure S4. Km determination for the IRAP Absorbance assay in 1536-well format.** Km calculation at 4 protein concentrations (0.00375, 0.00188, 0.00094 and 0.00047 mg/ml) using Xlfit version 5.4.0.8.

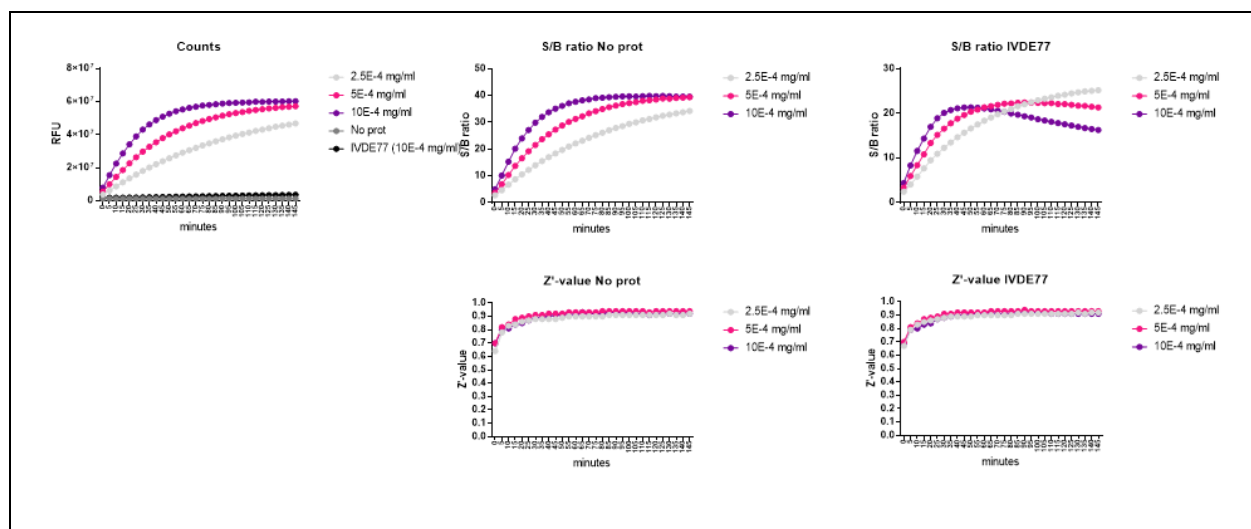

**Figure S5. Fluorescence IRAP assay with black non-binding plates and 0.05% BSA added to the assay buffer in 1536-well format.** Counts, S/B ratio and Z'-value. In 1536-well 2  $\mu$ L buffer with DMSO or compound (IVDE77, HA08 or I), 2  $\mu$ L IRAP (f.a.c. 10E-4, 5E-4 or 2.5E-4 mg/ml) and 4  $\mu$ L L-Leucine-7-amido-4-methylcoumarin (f.a.c. 37.5  $\mu$ M) were manually dispensed in a 1536-well black non-binding assay plate (Corning, #3728). For the MAX effect either no protein (2  $\mu$ L assay buffer was added instead of IRAP) or 1  $\mu$ M IVDE77 was included. Plates were measured on the Envision every 5 minutes for 2.5 hours.

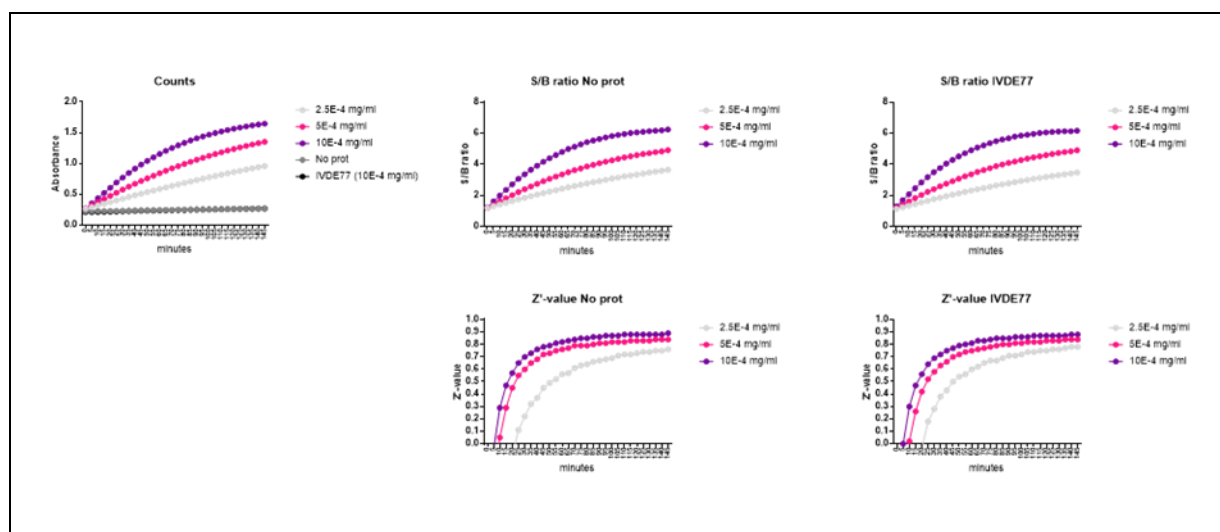

**Figure S6. Absorbance IRAP assay with black non-binding plates and 0.05% BSA added to the assay buffer in 1536-well format.** Counts, S/B ratio and Z'-value at 0.4 mM substrate. In 1536-well 2  $\mu$ L buffer with DMSO or compound (IVDE77, HA08 or I), 2  $\mu$ L IRAP (f.a.c. 10E-4, 5E-4 or 2.5E-4 mg/ml) and 4  $\mu$ L L-Leucine p-Nitroanilide (f.a.c. 0.4 mM) were manually dispensed in a 1536-well non-binding black view assay plate (Corning, #3895). For the MAX effect either no protein (2  $\mu$ L assay buffer was added instead of IRAP) or 1  $\mu$ M IVDE77 was included. Plates were measured on the Envision every 5 minutes for 2.5 hours.

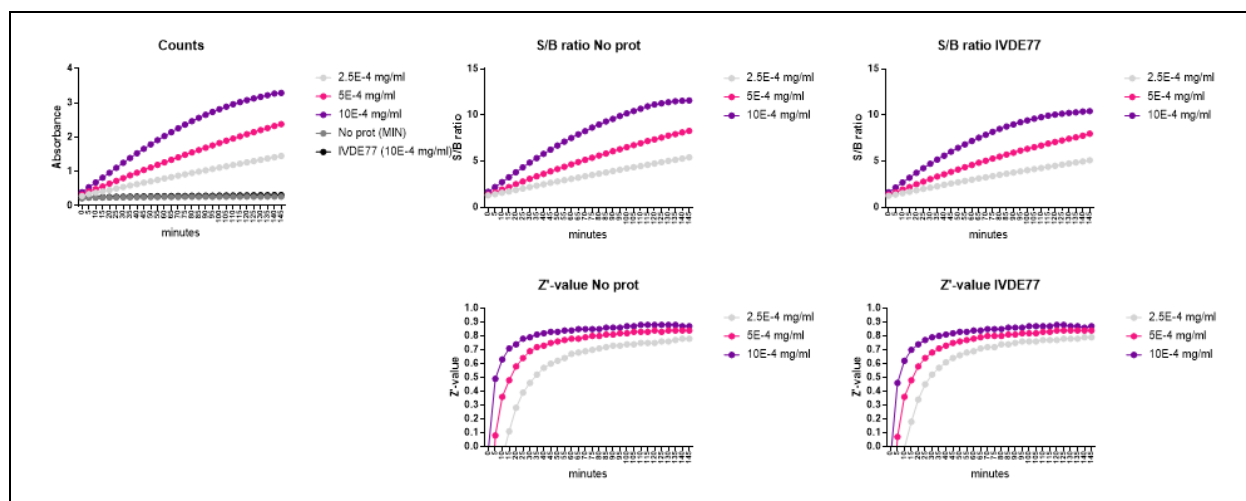

**Figure S7. Absorbance IRAP assay with black non-binding plates and 0.05% BSA added to the assay buffer in 1536-well format.** Counts, S/B ratio and Z'-value at 1 mM substrate. In 1536-well 2  $\mu$ L buffer with DMSO or compound (IVDE77, HA08 or I), 2  $\mu$ L IRAP (f.a.c. 10E-4, 5E-4 or 2.5E-4 mg/mL) and 4  $\mu$ L L-Leucine p-Nitroanilide (f.a.c. 1 mM) were manually dispensed in a 1536-well non-binding black view assay plate (Corning, #3895). For the MAX effect either no protein (2  $\mu$ L assay buffer was added instead of IRAP) or 1  $\mu$ M IVDE77 was included. Plates were measured on the Envision every 5 minutes for 2.5 hours.

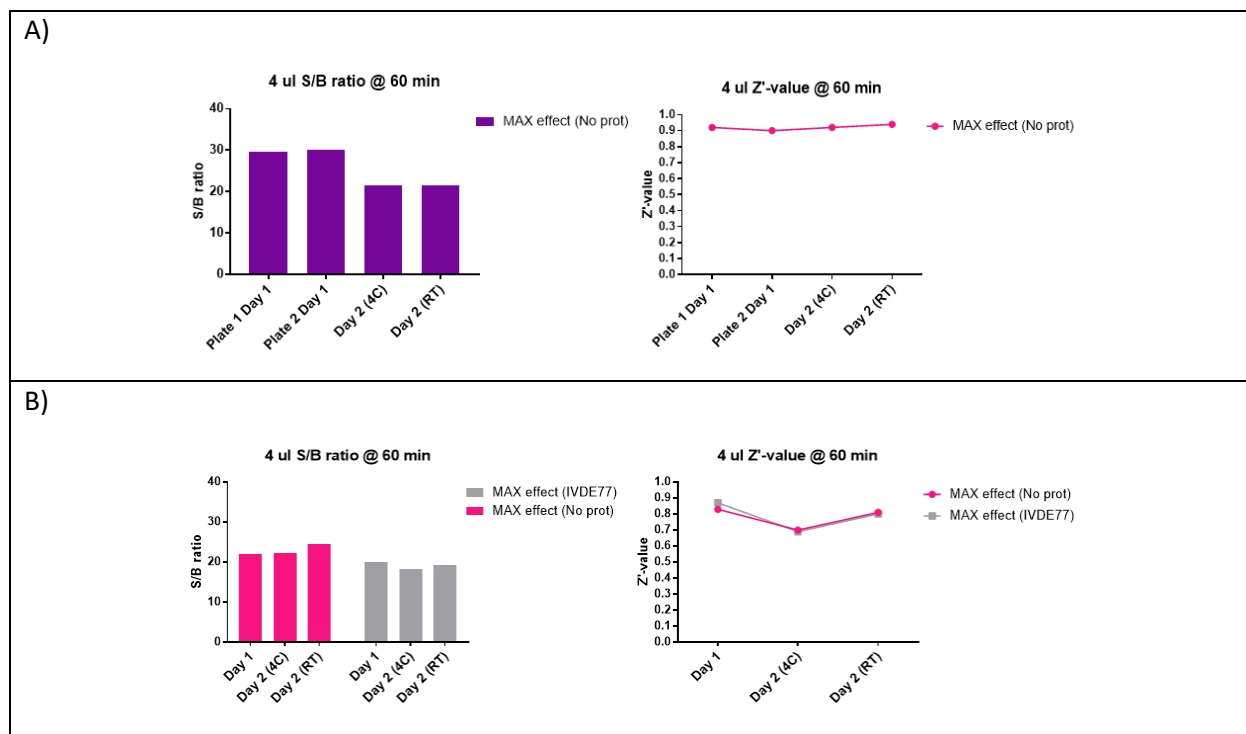

**Figure S8. Fluorescence IRAP assay reagent stability.** A) With the ECHO 10 nL DMSO was transferred to a black non-binding assay plate (Corning #3728). 2  $\mu$ L IRAP (f.a.c. 2.5E-4 mg/mL) was added using the Certus and 2  $\mu$ L L-Leucine-7-amido-4-methylcoumarin (f.a.c. 37.5  $\mu$ M) was added using the FLEXdrop. In the MAX effect wells 2  $\mu$ L assay buffer was added instead of IRAP using the FLEXdrop. Plates were measured on Envision after 1 hour at RT in the dark. B) In 1536-well 1  $\mu$ L buffer with DMSO/IVDE77 (f.a.c. 0.25%/1  $\mu$ M), 1  $\mu$ L IRAP (f.a.c. 2.5E-4 mg/mL) and 2  $\mu$ L L-Leucine-7-amido-4-methylcoumarin (f.a.c. 37.5  $\mu$ M) were manually dispensed in a 1536-well black non-binding assay plates (Corning, #3728). Plates were measured on the Envision every 10 minutes for 140 minutes (only 60 minute time point shown).

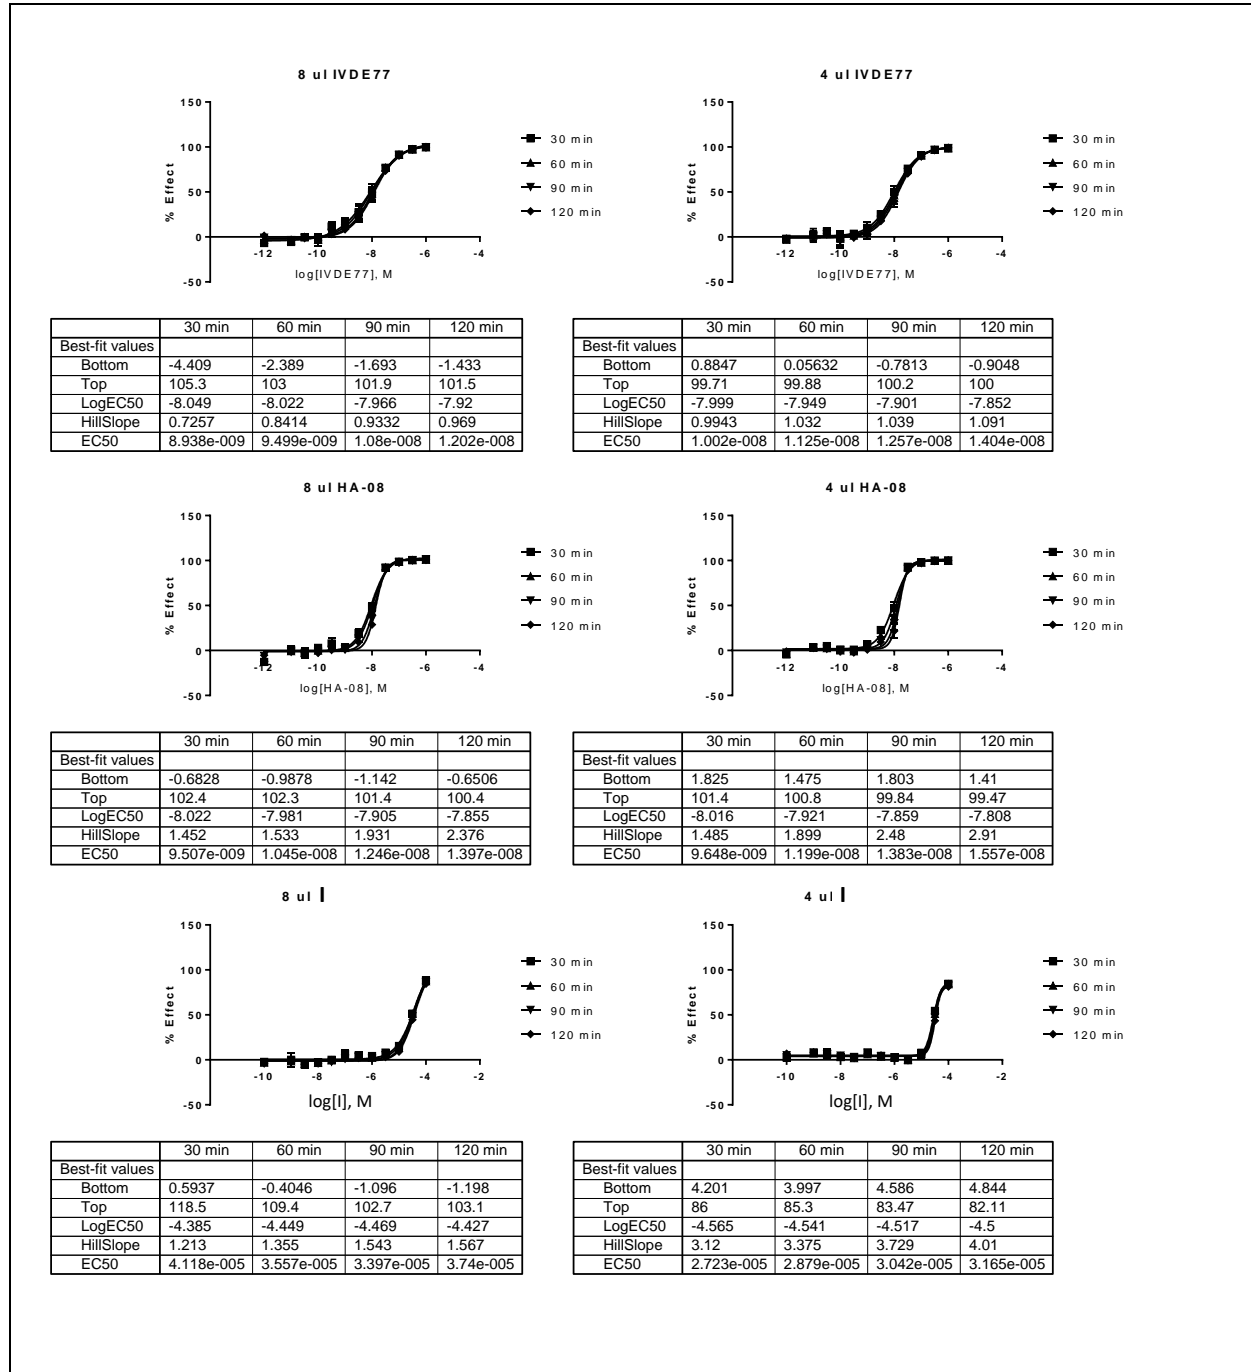

**Figure S9. Reference compounds in Fluorescence IRAP assay with different end volumes in 1536-well format.** S/B ratio and Z'-values; Reference compound DRC's. In 1536-well 1 or 2  $\mu$ L buffer with compound (IVDE77 and HA08: 1  $\mu$ M to 10 pM, I: 100 $\mu$ M – 1 nM (All compounds 12 points, V10 dilution; last point DMSO only)), 1 or 2  $\mu$ L IRAP (f.a.c. 2.5E-4 mg/ml) and 2 or 4  $\mu$ L Leucine-7-amido-4-methylcoumarin (f.a.c. 37.5  $\mu$ M) were manually dispensed in a 1536-well black non-binding assay plate (Corning, #3728). Plates were measured on the Envision every 10 minutes for 140 minutes (data shown up to 2 hours). %Effect was calculated using no protein as MAX effect (assay buffer was added instead of IRAP).

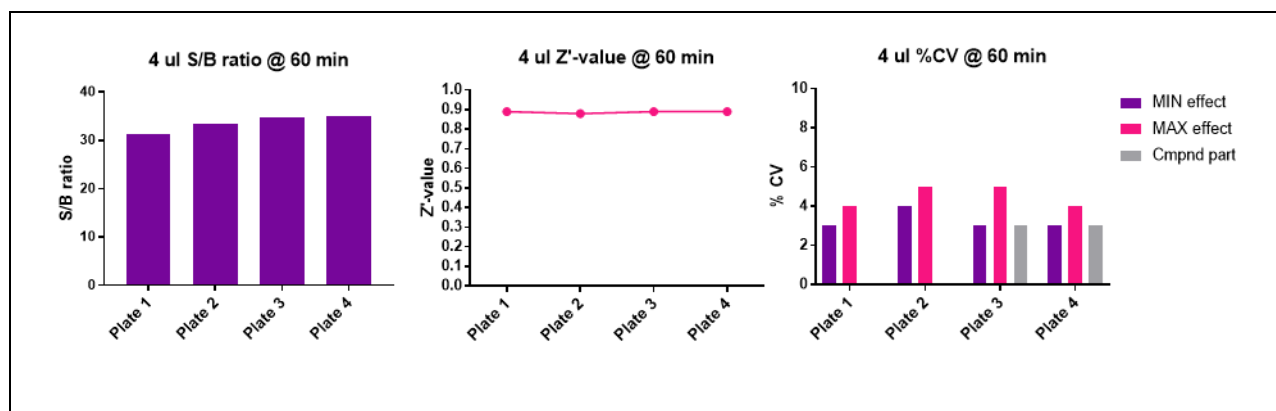

**Figure S10. Fluorescence IRAP assay with automated dispensing; S/B ratio, Z'-values and %CV.** With the ECHO 10 nL compound/DMSO was transferred to a black non-binding assay plate (Corning #3728). 2  $\mu$ L IRAP (f.a.c.  $2.5 \times 10^{-4}$  mg/mL) was added using the Certus and 2  $\mu$ L L-Leucine-7-amido-4-methylcoumarin (f.a.c.  $37.5 \mu$ M) was added using the FLEXdrop. In the MAX effect wells 2  $\mu$ L assay buffer was added instead of IRAP using the FLEXdrop. Plates were measured on Envision after 1 hour at RT in the dark.

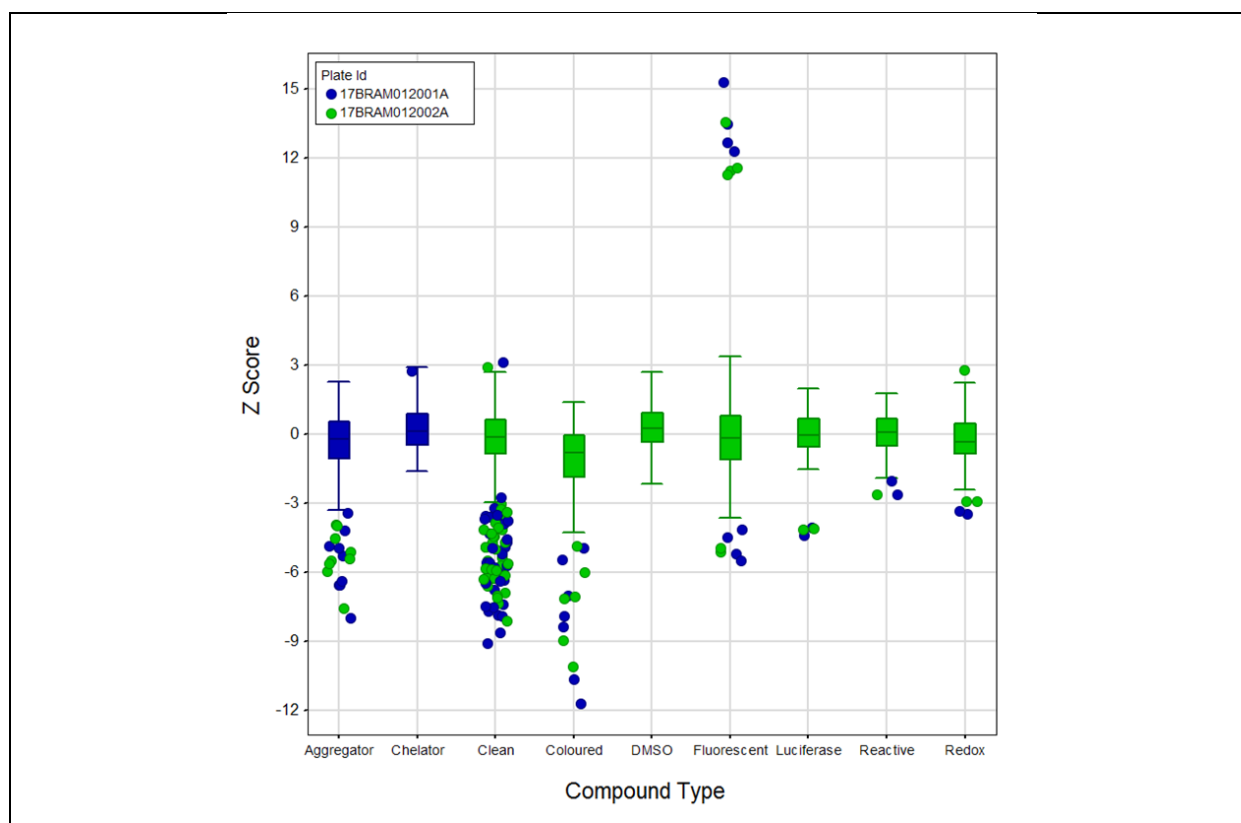

**Figure S11. Robustness set tested on duplicate plates for the Fluorescence IRAP assay.** Z-score for the robustness set compounds. Individual dots indicate the individual well values (compounds were tested in quadruplicate per plate), the color indicates the plate number (blue: 17BRAM012001A, green: 17BRAM012002A). With the ECHO 10 nL compound/DMSO was transferred to a black non-binding assay plate (Corning #3728). 2  $\mu$ L IRAP (f.a.c.  $2.5 \times 10^{-4}$  mg/ml) was added using the Certus and 2  $\mu$ L L-Leucine-7-amido-4-methylcoumarin (f.a.c.  $37.5 \mu$ M) was added using the FLEXdrop. Z-score was calculated based on the MIN effect wells (10 nL DMSO + 2  $\mu$ L IRAP + 2  $\mu$ L Substrate). Plates were measured on Envision after 1 hour at RT in the dark. Graphs generated using Dotmatics Vortex software.

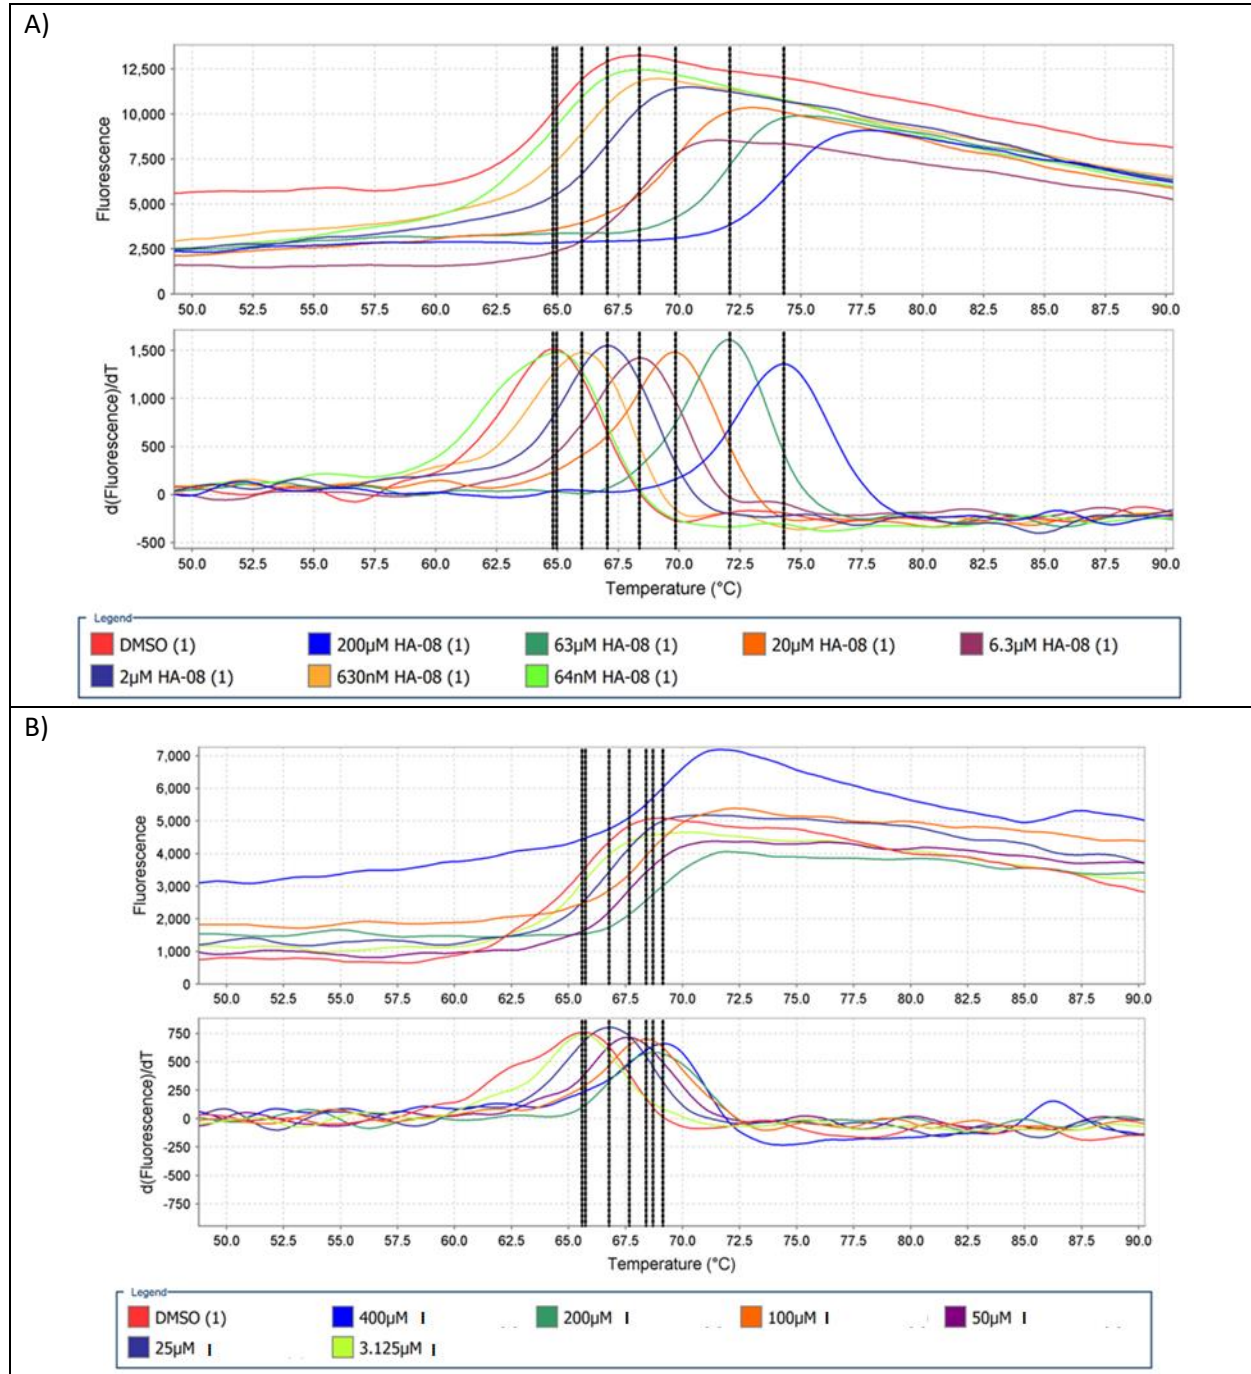

**Figure S12. Thermal Shift assay dose response results of HA08 and I.** Denaturation temperature of IRAP protein with DMSO and various concentrations of A) HA08 and B) I.



A)

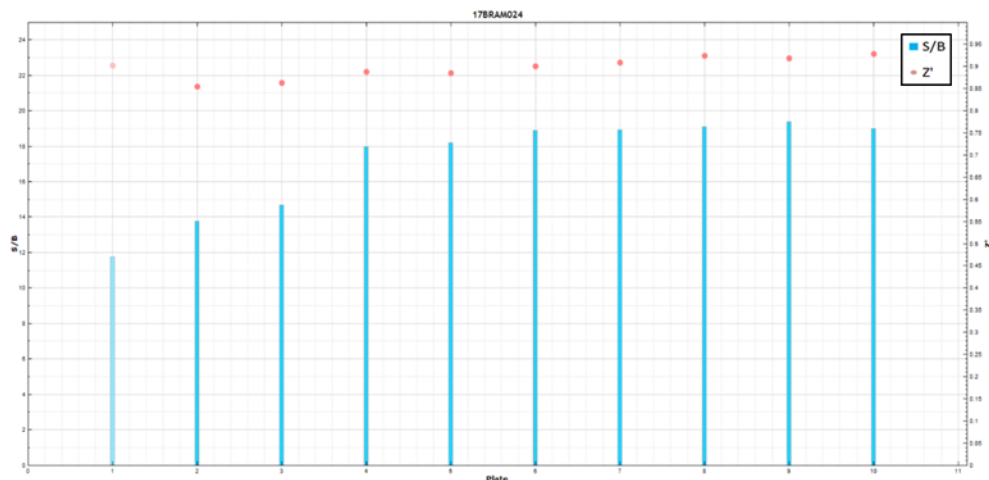

**Figure S13A. S/B (blue bars) and Z' values (red dots) for the primary IRAP assay.** With the ECHO 10 nL compound (f.a.c. 10  $\mu$ M) was transferred to a black non-binding assay plate (Corning #3728) after which the plates were manually sealed using adhesive seals. The next day 2  $\mu$ L IRAP (f.a.c. 2.5E-4 mg/mL) was added using the Certus and 2  $\mu$ L L-Leucine-7-amido-4-methylcoumarin (f.a.c. 37.5  $\mu$ M) was added using the FLEXdrop. In the MAX effect wells 2  $\mu$ L assay buffer was added instead of IRAP using the FLEXdrop. Plates were measured on the Envision after 1 hour at RT in the dark.

B)

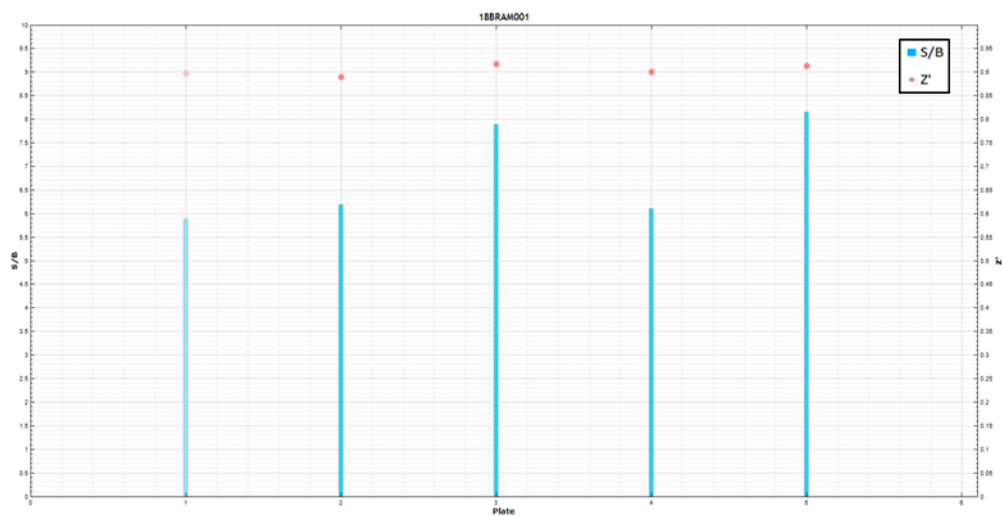

**Figure S13B. S/B (blue bars) and Z' values (red dots) for the orthogonal IRAP absorbance assay.** With the ECHO 20 nL compound was transferred to a black non-binding view assay plate (Corning #3895) after which the plates were manually sealed using adhesive seals. The next day 4  $\mu$ L IRAP (f.a.c. 2.5E-4 mg/mL) was added using the Certus and 4  $\mu$ L L-Leucine p-Nitroanilide (f.a.c. 1 mM) was added using the FLEXdrop. In the MAX effect wells 4  $\mu$ L assay buffer was added instead of IRAP using the FLEXdrop. Plates were measured on the Envision after 2 hours at RT in the dark.

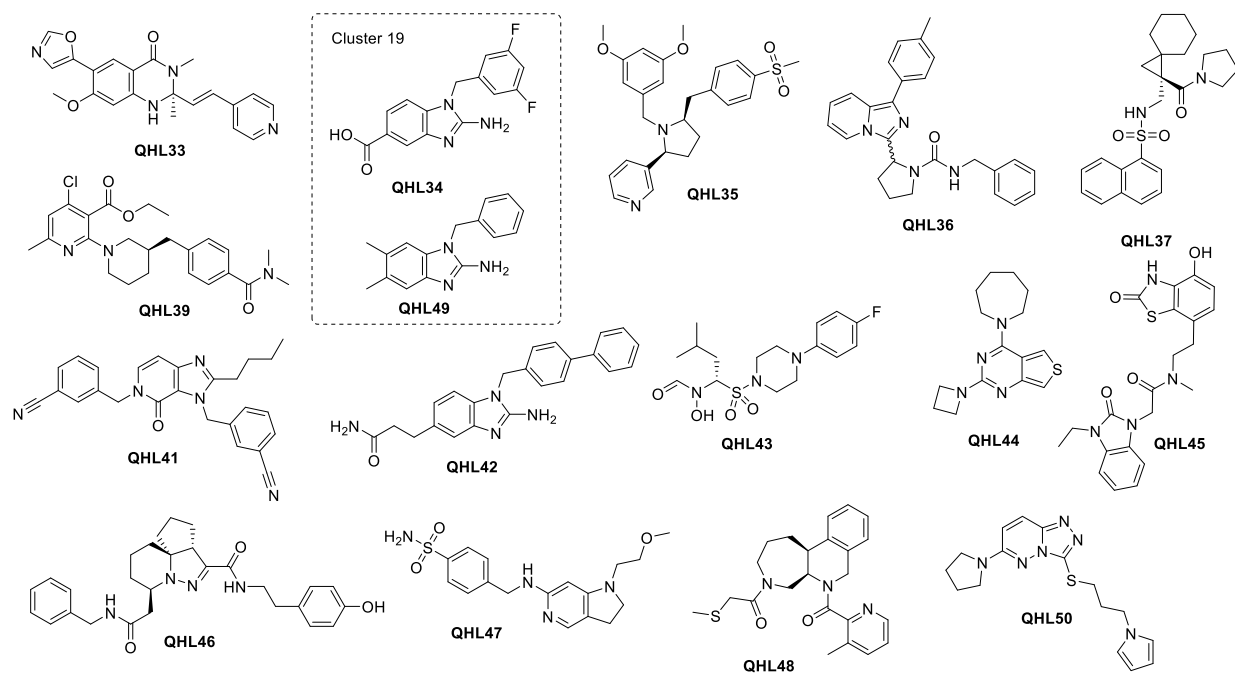

**Figure S14. Structures of remaining QHL compounds.**

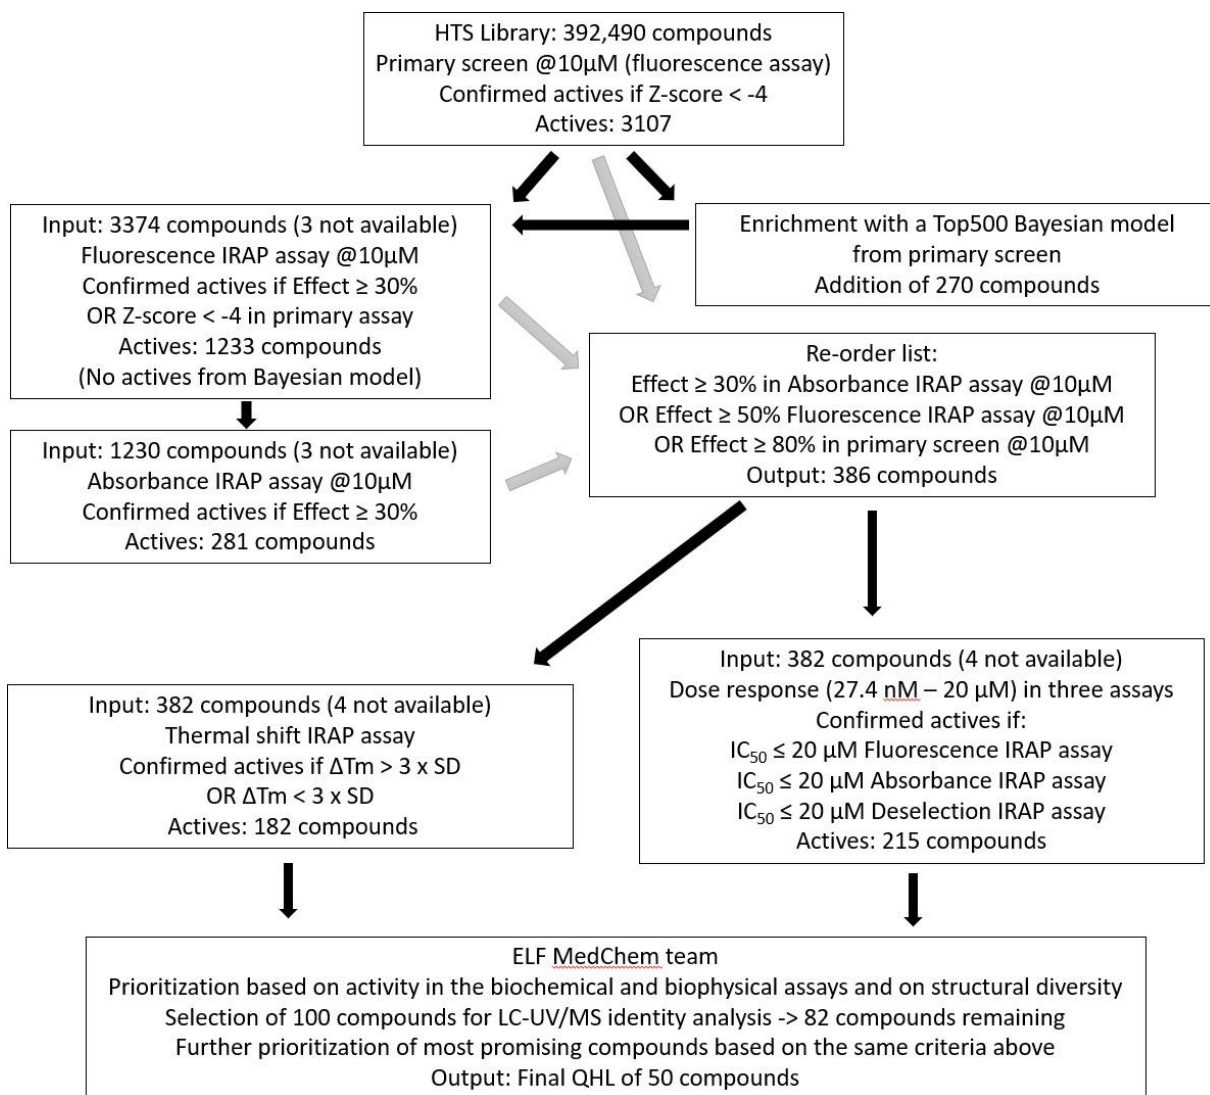

**Figure S15. Screening funnel with decision points.**

**Table S1. Summarized screening results and compound properties.**

| QHL# | Cluster | Fluorescens<br>IC50 (μM) | Fluorescens<br>pIC50 | Absorbance<br>pIC50 | Fluorescence<br>+ Zn<br>pIC50 | TSA<br>Δ °C | Mw<br>(g/mol) | HBA   | HBD  | TPSA<br>(Å²) | LogD | LipE | QED  |
|------|---------|--------------------------|----------------------|---------------------|-------------------------------|-------------|---------------|-------|------|--------------|------|------|------|
| 1    | NA      | 0.32                     | 6.50                 | 6.06                | 6.5                           | 6.77        | 346.40        | 6.00  | 2.00 | 95.09        | 1.65 | 4.85 | 0.65 |
| 2    | 26      | 0.35                     | 6.45                 | 6.10                | 6.47                          | 3.7         | 434.91        | 7.00  | 2.00 | 104.32       | 1.56 | 4.89 | 0.52 |
| 3    | 26      | 0.38                     | 6.42                 | 6.15                | 6.41                          | 5.22        | 382.47        | 7.00  | 2.00 | 108.22       | 2.34 | 4.08 | 0.54 |
| 4    | NA      | 0.71                     | 6.15                 | 5.70                | 6.17                          | 4           | 391.48        | 6.00  | 2.00 | 101.08       | 3.64 | 2.51 | 0.48 |
| 5    | 26      | 1.20                     | 5.92                 | 5.71                | 5.95                          | 4.29        | 390.86        | 6.00  | 2.00 | 95.09        | 2.13 | 3.79 | 0.59 |
| 6    | 26      | 1.26                     | 5.90                 | 5.24                | 5.91                          | 3.55        | 392.87        | 6.00  | 2.00 | 95.09        | 2.33 | 3.57 | 0.57 |
| 7    | NA      | 1.29                     | 5.89                 | <4.70               | 5.86                          | 0.3         | 362.80        | 4.00  | 1.00 | 33.09        | 3.79 | 2.10 | 0.72 |
| 8    | 26      | 1.32                     | 5.88                 | 5.45                | 5.89                          | 4.61        | 448.94        | 7.00  | 2.00 | 104.32       | 1.94 | 3.94 | 0.51 |
| 9    | 1       | 1.51                     | 5.82                 | <4.70               | 5.8                           | 0.15        | 344.39        | 7.00  | 1.00 | 112.49       | 2.84 | 2.98 | 0.79 |
| 10   | 15      | 1.58                     | 5.80                 | 4.80                | 5.78                          | 0.3         | 493.51        | 9.00  | 1.00 | 100.65       | 3.27 | 2.53 | 0.46 |
| 11   | 4       | 1.66                     | 5.78                 | 5.41                | 5.77                          | 1.92        | 400.94        | 5.00  | 2.00 | 64.15        | 3.21 | 2.57 | 0.83 |
| 12   | NA      | 1.91                     | 5.72                 | 4.86                | 5.71                          | -0.15       | 287.75        | 5.00  | 1.00 | 55.63        | 4.04 | 1.68 | 0.80 |
| 13   | NA      | 2.14                     | 5.67                 | 4.79                | 5.7                           | -1.91       | 392.50        | 7.00  | 0.00 | 59.31        | 3.28 | 2.39 | 0.61 |
| 14   | 1       | 2.24                     | 5.65                 | <4.70               | 5.63                          | 0.15        | 367.46        | 5.00  | 1.00 | 86.46        | 3.23 | 2.42 | 0.75 |
| 15   | 10      | 2.40                     | 5.62                 | <4.70               | 5.59                          | -0.89       | 363.24        | 5.00  | 0.00 | 39.15        | 2.08 | 3.54 | 0.83 |
| 16   | 16      | 2.63                     | 5.58                 | 5.42                | 5.55                          | 2.07        | 368.49        | 6.00  | 2.00 | 95.09        | 2.44 | 3.14 | 0.57 |
| 17   | NA      | 2.63                     | 5.58                 | <4.70               | 5.49                          | 0.3         | 419.50        | 7.00  | 1.00 | 107.82       | 3.39 | 2.19 | 0.70 |
| 18   | NA      | 2.82                     | 5.55                 | 5.25                | 5.57                          | 1.92        | 485.49        | 10.00 | 1.00 | 100.23       | 2.53 | 3.02 | 0.56 |
| 19   | 1       | 2.82                     | 5.55                 | 4.79                | 5.53                          | 0.3         | 355.46        | 6.00  | 2.00 | 105.91       | 3.72 | 1.83 | 0.75 |
| 20   | 16      | 2.82                     | 5.55                 | 5.24                | 5.5                           | 4.15        | 404.93        | 6.00  | 2.00 | 123.33       | 2.84 | 2.71 | 0.54 |
| 21   | 25      | 2.95                     | 5.53                 | 5.25                | 5.55                          | 2.66        | 330.36        | 6.00  | 2.00 | 78.35        | 2.96 | 2.57 | 0.67 |
| 22   | 15      | 3.09                     | 5.51                 | <4.70               | 5.52                          | 0.15        | 464.52        | 8.00  | 1.00 | 95.08        | 3.17 | 2.34 | 0.49 |
| 23   | NA      | 3.09                     | 5.51                 | <4.70               | 5.49                          | 0.44        | 250.26        | 5.00  | 0.00 | 56.74        | 2.90 | 2.61 | 0.55 |
| 24   | NA      | 3.09                     | 5.51                 | 5.52                | 5.26                          | 4           | 387.47        | 7.00  | 2.00 | 98.33        | 1.94 | 3.57 | 0.55 |
| 25   | 1       | 3.16                     | 5.50                 | <4.70               | 5.46                          | 0           | 367.42        | 6.00  | 1.00 | 66.81        | 3.20 | 2.30 | 0.77 |
| 26   | NA      | 3.24                     | 5.49                 | 5.11                | 5.45                          | 4.44        | 428.52        | 7.00  | 2.00 | 104.32       | 2.58 | 2.91 | 0.51 |
| 27   | NA      | 3.24                     | 5.49                 | 4.97                | 5.29                          | 1.48        | 325.40        | 5.00  | 0.00 | 59.23        | 3.35 | 2.14 | 0.87 |
| 28   | NA      | 3.24                     | 5.49                 | 4.81                | 5.25                          | 0.15        | 330.42        | 4.00  | 1.00 | 96.50        | 3.95 | 1.54 | 0.73 |
| 29   | 25      | 3.31                     | 5.48                 | 5.53                | 5.49                          | 1.92        | 360.84        | 6.00  | 2.00 | 78.35        | 3.88 | 1.60 | 0.64 |
| 30   | 15      | 3.47                     | 5.46                 | <4.7                | 5.41                          | 0.3         | 464.52        | 8.00  | 1.00 | 95.08        | 3.03 | 2.43 | 0.49 |
| 31   | NA      | 3.47                     | 5.46                 | <4.70               | 5.38                          | 0           | 278.68        | 2.00  | 0.00 | 17.82        | 4.41 | 1.05 | 0.64 |
| 32   | NA      | 3.47                     | 5.46                 | <4.70               | 5.21                          | 0.15        | 290.36        | 6.00  | 1.00 | 59.51        | 2.36 | 3.10 | 0.88 |
| 33   | NA      | 3.72                     | 5.43                 | 5.510               | 5.42                          | 0.74        | 376.41        | 7.00  | 1.00 | 80.49        | 1.61 | 3.82 | 0.75 |
| 34   | 19      | 3.89                     | 5.41                 | <4.70               | 5.39                          | 0.3         | 303.26        | 5.00  | 3.00 | 81.14        | 1.53 | 3.88 | 0.78 |
| 35   | NA      | 3.98                     | 5.40                 | 4.85                | 5.34                          | 0           | 466.59        | 6.00  | 0.00 | 77.11        | 4.25 | 1.15 | 0.49 |
| 36   | NA      | 3.98                     | 5.40                 | 5.80                | 5.31                          | 0.3         | 424.54        | 5.00  | 1.00 | 49.64        | 5.11 | 0.29 | 0.50 |
| 37   | NA      | 4.37                     | 5.36                 | <4.70               | 5.36                          | 0.15        | 426.57        | 5.00  | 1.00 | 74.86        | 3.62 | 1.74 | 0.79 |
| 38   | 4       | 4.68                     | 5.33                 | 4.96                | 5.34                          | 2.22        | 401.93        | 6.00  | 2.00 | 77.04        | 2.27 | 3.06 | 0.78 |
| 39   | NA      | 4.68                     | 5.33                 | 5.12                | 5.33                          | 0           | 443.97        | 6.00  | 0.00 | 62.74        | 4.67 | 0.66 | 0.58 |
| 40   | 10      | 4.68                     | 5.33                 | <4.70               | 5.28                          | 0.3         | 375.78        | 7.00  | 1.00 | 68.25        | 0.95 | 4.38 | 0.85 |
| 41   | NA      | 4.68                     | 5.33                 | 5.81                | 5.11                          | 0.44        | 421.49        | 6.00  | 0.00 | 85.71        | 4.74 | 0.59 | 0.56 |
| 42   | NA      | 4.79                     | 5.32                 | 5.40                | 5.32                          | 2.96        | 370.45        | 5.00  | 4.00 | 86.93        | 4.03 | 1.29 | 0.54 |
| 43   | NA      | 5.89                     | 5.23                 | 5.12                | 5.27                          | 3.26        | 387.47        | 7.00  | 1.00 | 89.54        | 2.07 | 3.16 | 0.44 |
| 44   | NA      | 6.46                     | 5.19                 | <4.70               | 5.18                          | 0.44        | 288.41        | 4.00  | 0.00 | 60.50        | 3.69 | 1.50 | 0.85 |
| 45   | NA      | 7.76                     | 5.11                 | 6.09                | 5.12                          | 0.89        | 426.49        | 8.00  | 2.00 | 118.49       | 2.37 | 2.74 | 0.69 |
| 46   | NA      | 7.76                     | 5.11                 | 5.82                | 5.11                          | 0.3         | 474.59        | 7.00  | 3.00 | 94.03        | 3.51 | 1.60 | 0.54 |
| 47   | NA      | 10.23                    | 4.99                 | 5.51                | 4.99                          | 0.3         | 362.45        | 7.00  | 3.00 | 105.93       | 1.42 | 3.57 | 0.77 |
| 48   | NA      | 17.38                    | 4.76                 | 5.47                | 4.77                          | 0.3         | 409.54        | 5.00  | 0.00 | 78.81        | 2.94 | 1.82 | 0.78 |
| 49   | 19      | 17.78                    | 4.75                 | 5.65                | 4.74                          | 0.44        | 251.33        | 3.00  | 2.00 | 43.84        | 3.99 | 0.76 | 0.75 |
| 50   | NA      | 18.20                    | 4.74                 | 5.36                | 4.7                           | 0.44        | 328.44        | 6.00  | 0.00 | 76.55        | 2.68 | 2.06 | 0.51 |

TSA: thermal shift assay; HBA, HBD: number hydrogen bond accepting and donating groups; TPSA , topological polar surface area; LipE: calculated from (pIC<sub>50</sub>Fluorescence – LogD); QED<sup>4</sup>: quantitative estimate of drug-likeness.

**Table S2. Compound ELF screening history.**

| QHL# | Targets active | Targets Screened | Targets Active % | Enzyme Active | Enzymes Screened | Enzyme Active % |
|------|----------------|------------------|------------------|---------------|------------------|-----------------|
| 1    | 7              | 148              | 4.7              | 2             | 94               | 2.1             |
| 2    | 5              | 149              | 3.4              | 4             | 94               | 4.3             |
| 3    | 4              | 150              | 2.7              | 3             | 94               | 3.2             |
| 4    | 5              | 149              | 3.4              | 3             | 93               | 3.2             |
| 5    | 4              | 148              | 2.7              | 3             | 92               | 3.3             |
| 6    | 5              | 148              | 3.4              | 3             | 93               | 3.2             |
| 7    | 9              | 149              | 6.0              | 8             | 93               | 8.6             |
| 8    | 6              | 149              | 4.0              | 4             | 94               | 4.3             |
| 9    | 4              | 76               | 5.3              | 2             | 41               | 4.9             |
| 10   | 2              | 77               | 2.6              | 2             | 42               | 4.8             |
| 11   | 5              | 147              | 3.4              | 4             | 95               | 4.2             |
| 12   | 3              | 141              | 2.1              | 3             | 84               | 3.6             |
| 13   | 19             | 144              | 13.2             | 12            | 85               | 14.1            |
| 14   | 5              | 76               | 6.6              | 3             | 41               | 7.3             |
| 15   | 10             | 141              | 7.1              | 6             | 85               | 7.1             |
| 16   | 4              | 143              | 2.8              | 4             | 79               | 5.1             |
| 17   | 5              | 151              | 3.3              | 4             | 95               | 4.2             |
| 18   | 5              | 85               | 5.9              | 3             | 50               | 6.0             |
| 19   | 6              | 76               | 7.9              | 4             | 42               | 9.5             |
| 20   | 3              | 103              | 2.9              | 1             | 54               | 1.9             |
| 21   | 9              | 144              | 6.3              | 6             | 87               | 6.9             |
| 22   | 3              | 151              | 2.0              | 3             | 95               | 3.2             |
| 23   | 2              | 83               | 2.4              | 1             | 48               | 2.1             |
| 24   | 2              | 57               | 3.5              | 2             | 37               | 5.4             |
| 25   | 2              | 77               | 2.6              | 2             | 42               | 4.8             |
| 26   | 1              | 145              | 0.7              | 1             | 85               | 1.2             |
| 27   | 5              | 146              | 3.4              | 4             | 80               | 5.0             |
| 28   | 6              | 150              | 4.0              | 4             | 94               | 4.3             |
| 29   | 14             | 137              | 10.2             | 10            | 85               | 11.8            |
| 30   | 16             | 142              | 11.3             | 8             | 84               | 9.5             |
| 31   | 8              | 151              | 5.3              | 5             | 95               | 5.3             |
| 32   | 2              | 76               | 2.6              | 1             | 42               | 2.4             |
| 33   | 5              | 145              | 3.4              | 4             | 93               | 4.3             |
| 34   | 2              | 139              | 1.4              | 1             | 75               | 1.3             |
| 35   | 8              | 145              | 5.5              | 6             | 88               | 6.8             |
| 36   | 6              | 104              | 5.8              | 4             | 56               | 7.1             |
| 37   | 7              | 75               | 9.3              | 5             | 41               | 12.2            |
| 38   | 9              | 138              | 6.5              | 5             | 79               | 6.3             |
| 39   | 7              | 143              | 4.9              | 6             | 85               | 7.1             |
| 40   | 6              | 143              | 4.2              | 4             | 94               | 4.3             |
| 41   | 8              | 146              | 5.5              | 6             | 79               | 7.6             |
| 42   | 12             | 148              | 8.1              | 6             | 82               | 7.3             |
| 43   | 5              | 143              | 3.5              | 3             | 85               | 3.5             |
| 44   | 6              | 150              | 4.0              | 4             | 94               | 4.3             |
| 45   | 11             | 140              | 7.9              | 5             | 84               | 6.0             |
| 46   | 3              | 40               | 7.5              | 3             | 27               | 11.1            |
| 47   | 6              | 142              | 4.2              | 4             | 86               | 4.7             |
| 48   | 2              | 40               | 5.0              | 2             | 27               | 7.4             |
| 49   | 9              | 145              | 6.2              | 4             | 81               | 4.9             |
| 50   | 11             | 144              | 7.6              | 7             | 86               | 8.1             |

1. Nikolaou, A. *et al.* [3H]IVDE77, a novel radioligand with high affinity and selectivity for the insulin-regulated aminopeptidase. *Eur. J. Pharmacol.* **702**, 93–102 (2013).
2. Andersson, H. *et al.* Ligands to the (IRAP)/AT4 receptor encompassing a 4-hydroxydiphenylmethane scaffold replacing Tyr2. *Bioorg. Med. Chem.* **16**, 6924–6935 (2008).
3. Borhade, S. R. *et al.* Inhibition of insulin-regulated aminopeptidase (IRAP) by arylsulfonamides. *ChemistryOpen* **3**, 256–263 (2014).
4. Bickerton, G. R., Paolini, G. V., Besnard, J., Muresan, S. & Hopkins, A. L. Quantifying the chemical beauty of drugs. *Nat. Chem.* **2011 42** **4**, 90–98 (2012).
